# Supplementary material
Source: publisher site journal article supplement (https://www.degruyterbrill.com/publication/dbid/tjgo/downloadAsset/TJGO_TJGO%20Wengst%20-%20Nationalsozialismus--de.pdf)
Supplement: Supplementary file 1 [file TJGO_TJGO%20Wengst%20-%20Nationalsozialismus--de.pdf]

Udo Wengst

## Nationalsozialismus

Es gibt wohl weltweit kein historisches Thema, über das so viel geforscht und publiziert worden ist wie über den Nationalsozialismus. Die Fülle der veröffentlichten Titel ist auch für den Experten kaum noch zu überblicken, und ein Nachlassen der Beschäftigung mit dem Nationalsozialismus ist nicht in Sicht. Das „Dritte Reich“ und seine Vorgeschichte ist eine Vergangenheit, die nicht vergeht, sondern nach wie vor auf unsere Gegenwart einwirkt und von politischer Bedeutung ist. Die folgenden knappen Ausführungen können die wissenschaftliche Diskussion über den Nationalsozialismus auch nicht annähernd nachzeichnen. Es ist lediglich beabsichtigt, einige wenige Punkte aus diesem Diskurs herauszugreifen und damit in die Thematik einzuführen.

Die Geschichte der NSDAP beginnt bereits Jahre vor der „Machtergreifung“ mit ihrer Gründung Anfang 1920. Von Beginn an ist es Hitler gelungen, die Partei seinem Herrschaftsanspruch zu unterwerfen und zu einem persönlichen Instrument im politischen Kampf auszubauen. Der Erfolg der NSDAP, die in wenigen Jahren von einer unbedeutenden Splitterpartei zu einer Massenbewegung in den letzten Jahren der Weimarer Republik aufstieg, ist nach wie vor erklärungsbedürftig. Lange Zeit hat man geglaubt, dass sich die Mitglieder und Wähler der NSDAP vor allem aus dem Mittelstand rekrutiert hätten. Theodor Geiger hat 1930 daher von einer „Panik im Mittelstand“ gesprochen.<sup>1</sup> Besonders die Forschungen Jürgen W. Falters haben jedoch gezeigt, dass die NSDAP als erste „Volkspartei“ in Deutschland bezeichnet werden kann, die jedoch mittelständisch geprägt war.<sup>2</sup>

Die Gründe für den Erfolg der NSDAP sind vielfältig und können hier nicht im einzelnen aufgeführt werden. Kurz eingegangen werden soll jedoch auf die Zusammenhänge, die letztlich zur „Machtergreifung“ Hitlers geführt haben. Lange Zeit, und bis heute nicht von allen Historikern aufgegeben, hat die These dominiert, dass Hitler seine Ernennung zum Reichskanzler der Einflussnahme aus der Großindustrie und der Bankenwelt zu verdanken gehabt habe eine These, die meist von denjenigen vertreten worden ist, die im Hinblick auf das „Dritte Reich einen Primat der Wirtschaft unterstellen. Forschungen der letzten 30 Jahre haben indessen ergeben, dass zahlreiche Argumente dafür sprechen, von einem Primat der Politik auszugehen, dies sowohl im Hinblick auf den Prozess der „Machtergreifung“, auf den Vertreter der Großindustrie keinen Einfluss hatten<sup>3</sup>, als auch in den Jahren der Herrschaft des Nationalsozialismus, unter der die kapitalistische Wirtschaftsordnung zwar unangetastet blieb, die Unternehmer sich aber nach den Vorgaben der Politik zu richten hatten. Gleichwohl gibt es bis heute Autoren, die unter Annahme der „sozioökonomischen Gesetzmäßigkeiten des Klassenkonflikts“ auf eine historische Verbindung von Kapitalismus und Nationalsozialismus schließen.<sup>4</sup>

---

1 Theodor Geiger: Panik im Mittelstand, in: Die Arbeit, 7 (1930), S. 637-654

2 Jürgen W. Falter: Hitlers Wähler, München 1991, S. 372

3 Dazu Henry Ashby Turner: Die Großunternehmer und der Aufstieg Hitlers, Berlin 1985

4 Vgl. Timothy W. Mason: Sozialpolitik im Dritten Reich. Arbeiterklasse und Volksgemeinschaft, Opladen 1977, Zitat S. 41

Noch ehe die Nationalsozialisten die Macht in Deutschland übernommen hatten, setzte die Diskussion darüber ein, ob der Nationalsozialismus mit dem Begriff des Faschismus oder dem des Totalitarismus erfasst werden könne. Der Faschismusbegriff wurde vor allem von denjenigen als angemessen angesehen, die einem Primat der Wirtschaft das Wort redeten und in den faschistischen Bewegungen nur Agenten für kapitalistische Wirtschaftsinteressen erblickten. Der Faschismusbegriff, soweit er sich am marxistischen Modell orientierte, ist im Folgenden deutlich differenziert worden (August Thalheimer, Otto Bauer).<sup>5</sup> Daneben hat vor allem Ernst Nolte den Faschismus als auf Europa bezogenen Epochenbegriff definiert, den er ideengeschichtlich begründete.<sup>6</sup>

Gemeinsam ist den Vertretern einer den Nationalsozialismus als Faschismus deutenden Interpretation die Frontstellung gegen die Totalitarismustheorie. Auch hierbei handelt es sich wie bei der Faschismusinterpretation um eine Schöpfung der Zwischenkriegszeit, die allerdings im Zeitalter des Kalten Krieges eine politische Aufladung erfuhr und deshalb in der Phase der Entspannung bei vielen als diskreditiert galt.<sup>7</sup> Darüber hinaus wurde diesem Ansatz, der in seiner vergleichenden Betrachtung von nationalsozialistischer und kommunistischer Diktatur auf die Gemeinsamkeiten der jeweiligen Herrschaftspraxis abstellte eine Ideologie, eine Partei, eine terroristische Geheimpolizei, ein Nachrichtenmonopol, eine zentral gelenkte Wirtschaft<sup>8</sup> vorgeworfen, die Wandlungsprozesse z. B. in den kommunistischen Ländern nicht erfassen zu können. In jüngster Zeit ist jedoch wiederholt darauf hingewiesen worden, dass es sich bei dem Totalitarismusbegriff um ein „brauchbares Analysewerkzeug“<sup>9</sup> handle und daher an ihm festgehalten werden müsse. Die Überlegenheit des Totalitarismusbegriffs gegenüber dem Faschismusbegriff sehen Historiker wie z. B. Karl Dietrich Bracher und Hans Maier darin, dass er zur Deutung und zum Verständnis moderner Diktaturen besser geeignet sei.<sup>10</sup>

Die Kritik am Totalitarismuskonzept drückt sich auch in dem Vorwurf aus, dass seine Vertreter das „Dritte Reich als eine Monokratie interpretieren, die es nicht gewesen sei. Besonders vehement hat diese Auffassung Hans Mommsen vertreten, der die Bedeutung Hitlers relativierte und ihn in mancher Hinsicht als „schwachen Diktator“ bezeichnete.“<sup>11</sup> Dagegen hat die Mehrheit der Historiker an der ausschlaggebenden Rolle Hitlers im Herrschaftssystem des „Dritten

---

5 Dazu im Überblick Wolfgang Wippermann: *Faschismustheorien. Die Entwicklung der Diskussion von den Anfängen bis heute*, 7., überarbeitete Auflage Darmstadt 1997

6 Ernst Nolte: *Der Faschismus in seiner Epoche. Action française. Italienischer Faschismus. Nationalsozialismus. Mit einem Rückblick nach fünfundsiebzig Jahren*, 5. Auflage München-Zürich 2000

7 Gerhard Schulz: *Faschismus Nationalsozialismus. Versionen und theoretische Kontroversen 1922 1972*, Frankfurt a. M. 1974, S. 138 147

8 Carl J. Friedrich: *Totalitäre Diktatur*, Stuttgart 1957, S. 80

9 Michael Burleigh: *Die Zeit des Nationalsozialismus. Eine Gesamtdarstellung*, Frankfurt a. M. 2000, S. 30.

10 Karl Dietrich Bracher: *Zeitgeschichtliche Kontroversen. Um Faschismus, Totalitarismus, Demokratie*, 5., veränderte und erweiterte Auflage München 1984, S. 13 33; Hans Maier (Hrsg.): *Wege in die Gewalt. Die modernen politischen Religionen*, Frankfurt a. M. 1995

11 Hans Mommsen: *Nationalsozialismus*, in: *Sowjetsystem und demokratische Gesellschaft. Eine vergleichende Enzyklopädie*, Bd. 4, Freiburg i. Br. 1970, S. 702.

Reiches“ festgehalten, wobei auch Vertreter des totalitarismustheoretischen Ansatzes frühzeitig das „Dritte Reich“ als Polykratie gekennzeichnet haben<sup>12</sup>, ohne indessen so weit zu gehen, die Machtstellung Hitlers zu bezweifeln. Dieter Rebentisch hat den NS-Staat als einen „auf Hitlers Willkürherrschaft zentrierten atavistischen Personenverband bezeichnet“<sup>13</sup>, und Hans-Ulrich Thamer – wie vor ihm Karl Dietrich Bracher wies darauf hin, dass das „Dritte Reich“ eine „starke monokratische Spitze und gleichzeitig polykratische Machtstrukturen“ besessen habe.<sup>14</sup>

In dieser Diskussion geht es schließlich auch um die Auseinandersetzung zwischen „Personalismus“ und „Strukturalismus“. Während die Anhänger des ersteren den biographischen Ansatz in der Geschichtsschreibung als tragfähig bezeichnen, glauben die Vertreter des letzteren, den menschlichen Faktor weitgehend vernachlässigen und allein in strukturellen Bedingungen die notwendigen Erklärungen finden zu können. Demgegenüber hat Klaus Hildebrand darauf hingewiesen, dass gerade die Forschungen über den Nationalsozialismus erwiesen hätten, dass die beiden Positionen einander wohl mehr verdanken und zweifellos stärker aufeinander angewiesen seien, „als in der teilweise mit einem kräftigen Schuss von wissenschaftlicher Polemik geführten Debatte deutlich geworden sein mag“.<sup>15</sup>

Eine neue Etappe erreichte die Auseinandersetzung über die Interpretation des Nationalsozialismus zu Beginn der 1980er Jahre, als in Fortsetzung der Kontroverse über den monokratischen oder polykratischen Charakter des NS-Staates die sogenannten „Intentionalisten“ und „Funktionalisten“ ihre Klingen kreuzten.<sup>16</sup> Ergiebig war diese Debatte nicht, da die Verabsolutierung einseitiger Interpretationsansätze an der Realität des „Dritten Reiches“ vorbeigeht, wie insbesondere Dieter Rebentisch auf der Grundlage intensiver Quellenstudien nachweisen konnte.<sup>17</sup>

So lange über das „Dritte Reich“ geforscht und diskutiert worden ist, hat die Frage nach der Kontinuität, nach den Wurzeln des Nationalsozialismus in der deutschen Geschichte und damit die Frage nach dem deutschen „Sonderweg“ zur Debatte gestanden. Entgegen einer anfangs vor allem aus dem Ausland die Zusammenhänge vereinfachenden Sichtweise, die eine Kontinuität von Luther über Preußen zu Hitler unterstellte und einen deutschen „Sonderweg“ in die Moderne postulierte, haben inzwischen differenziertere Bewertungen Platz gegriffen. So hat beispielsweise Thomas Nipperdey darauf hingewiesen, „dass 1933 mit der Mehrzahl der dominanten (wenn auch unterschiedlichen) Kontinuitäten der deutschen Geschichte eng verknüpft ist und ohne den Rekurs auf diese Kontinuität keine historische Erklärung möglich ist“, aber jeder Verengung der historischen Vergangenheit als „Vorgeschichte“ des Nationalsozialismus

12 Gerhard Schulz: Der Begriff des Totalitarismus und der Nationalsozialismus, in: Soziale Welt 12 (1961), S. 112–128; Gerhard Schulz: Neue Kontroversen in der Zeitgeschichte. Führerstaat und „Führermythos“, in: Der Staat 22 (1983), S. 262–280, besonders S. 269

13 Dieter Rebentisch: Führerstaat und Verwaltung im Zweiten Weltkrieg. Verfassungsentwicklung und Verwaltungspolitik 1939–1945, Stuttgart 1989, S. 553

14 Hans-Ulrich Thamer: Verführung und Gewalt. Deutschland 1933–1945, Berlin u.a. 1986, S. 340

15 Klaus Hildebrand: Das Dritte Reich, 6. neubearbeitete Auflage München 2003, S. 168

16 Gerhard Schulz: Führerstaat (Anm. 12).

17 Dieter Rebentisch: Führerstaat (Anm. 13 passim).

widersprochen.<sup>18</sup> In der „Sonderwegsdebatte“ ist kein Ende in Sicht. Obwohl einige Autoren darauf hingewiesen haben, dass es einen europäischen „Normalweg“ in die Moderne nicht gegeben und jedes Land somit einen „Sonderweg“ eingeschlagen habe, hat Karl Dietrich Bracher den Vorschlag gemacht, im Hinblick auf Deutschland von einem „Sonderbewusstsein“ zu sprechen<sup>19</sup>, und Heinrich August Winkler hat jüngst erst wieder dezidiert die „Sonderwegsthese“ vertreten<sup>20</sup>, womit er jedoch verständlicherweise Widerspruch hervorgerufen hat.

Die hier nur in äußerst knapper Form abgehandelten Deutungen und Kontroversen über den Nationalsozialismus und das „Dritte Reich“, die längst nicht alle Facetten der Diskussion erfasst haben, sind das Ergebnis akribischer Quellenarbeit zahlreicher Historiker über Jahrzehnte hinweg. Auf die Bedeutung von Quellen für die historische Urteilsbildung hat Konrad Repgen Anfang der 1980er Jahre mit den Worten hingewiesen: „Zeitgeschichte ohne ständige und eindringliche Quellenkritik ist nicht Wissenschaft“.<sup>21</sup> Hieraus ergibt sich auch die Bedeutung von Quelleneditionen, die sofern es sich um wissenschaftliche Vorhaben handelt „immer im engsten Konnex mit Fragen der Forschung entstehen“. Horst Möllers Urteil ist daher ohne Einschränkung zuzustimmen, wenn er einen Beitrag über zeitgeschichtliche Editionen mit den Worten abschließt, dass sie „für die ständige Innovation innerhalb der Forschung unentbehrlich“ seien, und als Devise ausgibt: „Revision durch Edition“.<sup>22</sup>

Hieraus ergibt sich der Wert der Reihe „Deutsche Geschichte im 20. Jahrhundert Online“, deren erstes Segment zum Thema „Nationalsozialismus, Holocaust, Widerstand und Exil 1933 bis 1945“ jetzt vorliegt. Die darin enthaltenen Quellen, biographischen Materialien und Nachschlagewerke über den Nationalsozialismus bieten Forschern und Studenten bisher nicht vorhandene Möglichkeiten zur Volltextrecherche in allen Akteneditionen und eröffnen geführte Zugänge zu den Quellen über Personen-, Institutionen-, Orts- und Sachindizes sowie sonstige Hilfsmittel. Damit wird ein großer Datenbestand so vollständig erschlossen, wie das bisher noch nicht der Fall war. Sicherlich werden Wissenschaftler auch weiterhin Archive aufsuchen müssen, aber vorliegende Online-Edition wird ihnen den Einstieg in ein bereits gewähltes Thema erleichtern oder aber hilfreich sein, wenn es darum geht, neue Forschungsprojekte zu erarbeiten. Ganz besonders wichtig ist die Online-Edition für die akademische Lehre, da Studenten nunmehr ein

<sup>18</sup> Thomas Nipperdey: *Nachdenken über die deutsche Geschichte. Essays*, 2. Auflage München 1986, S. 197 und S. 204.

<sup>19</sup> *Deutscher Sonderweg - Mythos oder Realität?* Ein Kolloquium des Instituts für Zeitgeschichte, München-Wien 1982, S. 53.

<sup>20</sup> Heinrich August Winkler: *Der lange Weg nach Westen*, 2 Bde., München 2000, besonders S. 648 f.

<sup>21</sup> Konrad Repgen: *Vom Fortleben nationalsozialistischer Propaganda in der Gegenwart. Der Münchener Nuntius und Hitler 1933*, in: *Festschrift für A. Kraus zum 60. Geburtstag*, hrsg. von Pankraz Fried und Walter Ziegler, Kallmünz 1982, S. 473.

<sup>22</sup> Horst Möller: *Wie sinnvoll sind zeitgeschichtliche Editionen heute? Beispiele aus der Arbeit des Instituts für Zeitgeschichte*, in: *Quelleneditionen und kein Ende? Symposium der Monumenta Germaniae Historica und der Historischen Kommission bei der Bayerischen Akademie der Wissenschaften*, hrsg. von Lothar Gall/Rudolf Schieffer, München 1999 (HZ-Beiheft 28), S. 111f.

erschlossener Quellenbestand zur Geschichte des Nationalsozialismus zur Verfügung steht, der sich auf die Qualität von Seminar- und Prüfungsarbeiten positiv auswirken wird.

Diese allgemein gehaltenen Feststellungen sollen abschließend noch konkretisiert werden. Die Edition der Reden, Schriften und Anordnungen Hitlers kann nicht nur als „biographische Vorarbeit“ dienen, sondern ebenfalls als Nachschlagewerk, „das über viele Facetten Auskunft geben kann, die mit dem Aufstieg der NSDAP während der entscheidenden Jahre 1925 bis 1933 zusammenhingen“.<sup>23</sup> Die „Tagebücher von Joseph Goebbels“ liefern nicht nur „eine Fülle neuer Einsichten [...] in politische Entscheidungsprozesse und die Herrschaftsstruktur des NS-Regimes“, sondern sie sind ein einzigartiges Selbstzeugnis eines Mannes aus dem inneren Machtzirkel der NSDAP, das sowohl „die Frühgeschichte der NSDAP als auch „die nationalsozialistische Beherrschung und die Zerstörung des alten Europa sowie die Deutschland in den Abgrund reiße Katastrophe gleichermaßen spiegelt“.<sup>24</sup>

Der Wert der „Akten der Parteikanzlei“ ist insbesondere darin zu sehen, dass sie die „Kenntnis der polykratischen Herrschaftsverhältnisse im Führerstaat bedeutsam erweitert hat“<sup>25</sup> und die Kartei des Instituts für Zeitgeschichte zu den Nürnberger Kriegsverbrecherprozessen (Hauptprozess und alle zwölf Nachfolgeprozesse) erschließt sämtliche „Beweisdokumente der Anklage“ und leistet damit einen wesentlichen Beitrag für die Recherche in diesem immer noch wichtigen Quellenbestand.

Von anderer Beschaffenheit, aber ebenfalls für die Forschung unerlässlich, ist z. B. das „Inventar archivalischer Quellen des NS-Staates“, das dazu beiträgt, „die Einschätzung der Forschungsmöglichkeiten im universitären und außeruniversitären Bereich auf die Grundlage einer soliden Quelleninformation zu stellen und dadurch Forschungsvorhaben sowohl arbeitsökonomischer als auch innovativer zu gestalten“.<sup>26</sup> Eine ähnliche Funktion kommt dem Nachschlagewerk „Ämter, Abkürzungen, Aktionen des NS-Staates“ zu, das dazu dienen soll, die durch die „Vielzahl der durch den Dualismus von Staat und Partei während der nationalsozialistischen Diktatur bestehenden Amtsbezeichnungen und Ränge schwer durchschaubare „Vergleichbarkeit innerhalb der Führungshierarchie des Regimes für den Aktenbenutzer durchschaubar zu machen“.<sup>27</sup> Ebenso hilfreich dürfte für den Benutzer der Online-Edition sein, dass diese einen Auszug aus der „Deutschen Biographischen Enzyklopädie“ enthält, in dem die Personen aufge-

<sup>23</sup> Hitler: Reden Schriften Anordnungen. Februar 1925 bis Januar 1933. Band VI: Register, Karten und Nachträge. Bearbeitet von Katja Klee, Christian Hartmann und Klaus A. Lankheit, München 2003, S. XI

<sup>24</sup> Die Tagebücher von Joseph Goebbels. Im Auftrag des Instituts für Zeitgeschichte und mit Unterstützung des Staatlichen Archivdienstes Russlands herausgegeben von Elke Fröhlich. Teil I: Aufzeichnungen 1923-1941. Band 1/I: Oktober 1923 November 1925. Bearbeitet von Elke Fröhlich, München 2004, S. 7

<sup>25</sup> Michael Ruck: Akten der Parteikanzlei der NSDAP: Metamorphosen eines editorischen Großversuchs, in: 50 Jahre Institut für Zeitgeschichte. Eine Bilanz. Herausgegeben von Horst Möller und Udo Wengst, München 1999, S. 233.

<sup>26</sup> Inventar archivalischer Quellen des NS-Staates. Herausgegeben vom Institut für Zeitgeschichte. Band 3/1. Bearbeitet von Heinz Boberach, München u.a. 1991, S. VII

<sup>27</sup> Ämter, Abkürzungen, Aktionen des NS-Staates. herausgegeben vom Institut für Zeitgeschichte. Band 5. Bearbeitet von Heinz Boberach, Rolf Thommes und Hermann Weiß, München 1997, S. 5.

führt sind, die zur Zeit des „Dritten Reiches“ bereits das Erwachsenenalter erreicht hatten. Auch diese knappen Bemerkungen, die auf konkrete Beispiele bezogen waren, haben noch einmal deutlich gemacht, welche Chancen die durch die Online-Edition bereitgestellten Recherchemöglichkeiten für Forschung und akademische Lehre bieten.

München, April 2006
